# Supplementary material
Source: PubMed Central journal article supplement (PMC4624286)
Supplement: NIHMS731748-supplement-supplement.pdf [file NIHMS731748-supplement-supplement.pdf]

## Supplementary Online Content

Pagliaccio D, Barch DM, Bogdan R, et al. Shared predisposition in the association between cannabis use and subcortical brain structure. *JAMA Psychiatry*. Published online August 26, 2015. doi:10.1001/jamapsychiatry.2015.1054.

**eAppendix 1.** Family Structure Information and Sibling Pair Creation

**eAppendix 2.** MRI Pre-Processing Information

**eAppendix 3.** Variable Coding Information

**eAppendix 4.** Picture Vocabulary

**eAppendix 5.** Additional Covariates

**eTable 1.** Sibling Pairs by Cannabis Exposure, Zygosity, and Sex

**eTable 2.** Summary of Regression Results Controlling for Additional Covariates

**eTable 3.** Helmert Contrast Coding

**eTable 4.** Relationships Between Covariates and Cannabis Use Variables

**eTable 5.** Descriptive Statistics and Intercorrelations Among Brain Volumes

**eTable 6.** Interrelationships Among Covariates

**eTable 7.** Full Cannabis Exposure Regression Results

**eTable 8.** Full Times Used Regression Results

**eTable 9.** Full Age at Onset Regression Results

**eTable 10.** Volume Relationships With Cannabis Use by Light vs Heavier Use

**eTable 11.** Linear Mixed Model Results for Same-Sex Sibling Pairs

**eTable 12.** Linear Mixed Model Results for All Sibling Pairs

**eTable 13.** Control Analysis Results

**eFigure.** Histogram of Age at Onset and Times Using Cannabis

**eReferences**

This supplementary material has been provided by the authors to give readers additional information about their work.

### **eAppendix 1.** Family Structure Information and Sibling Pair Creation

173 families contributed multiple siblings to the current analysis; 11 families had data available from all four siblings, data from three siblings was available from 79 families, data from two siblings was available from 83 families, and 36 individuals were the only member of their family at the time of the June 2014 data release. This included 48 monozygotic and 45 dizygotic twin pairs where both twins had participated by this data release.

For the discordant sibling analyses, all possible pairings of siblings were drawn from the data (N=368 pairs from 173 families). For example, if all four siblings recruited from a given family had already participated by the current data release, six sibling pairs were created (sib1-sib2, sib1-sib3, sib1-sib4, sib2-sib3, sib2-sib4, sib3-sib4). Thus, any one individual could contribute to multiple paired observations. Sibling pairs were grouped as concordant exposed (both siblings ever used cannabis; N=123), concordant unexposed (both siblings never used cannabis; N=114), or discordant (one sibling reported use while their sibling never used cannabis; N=149). For ease of analysis and interpretability, the cannabis-exposed sibling in a discordant pair was always ordered first in the pair; the order of siblings was pseudo-randomized for concordant pairs to balance the sex and cannabis use distributions across siblings.

Given the confounds noted in the main text, we excluded 145 opposite-sex pairs, resulting in 241 sibling pairs (50 MZ, 45 DZ, and 146 non-twin siblings) of which 89 pairs were discordant for cannabis exposure, 81 were concordant for cannabis exposure, and 71 pairs were concordantly unexposed.

### **eAppendix 2.** MRI Pre-Processing Information

Relevant steps from the HCP processing pipeline included: (1) Down-sampling of the 0.7mm T1w image to 1mm using splines, (2) Intensity normalization and Talairach transformation (-autorecon1), (3) Skull registration, (4) FreeSurfer skull stripping, (5) FreeSurfer subcortical segmentation (-autorecon2), and (6) Extraction of volume statistics (-segstats).

### **eAppendix 3.** Variable Coding Information

Age of onset (1= $\leq$ 14years old, 2=15-17, 3=18-20, 4= $\geq$ 21)

Lifetime frequency of use (1=1-5 times used, 2=6-10, 3=11-100, 4=101-999, 5= $\geq$ 1000)

Total Household Income (1= $<$ \$10,000, 2=10,000-19,999, 3=20,000-29,999, 4=30,000-39,999, 5=40,000-49,999, 6=50,000-74,999, 7=75,000-99,999, 8= $\geq$ 100,000)

Alcohol use (drinks per day during the 12-month heaviest period of use 0=0, 1=1, 2=2, 3=3, 4=4, 5=5-6, 7=6+ drinks)

Non-cannabis illicit drug use (times used across the lifetime; 0=never, 1=1-2 times, 2=3-10, 3=11-25, 4= males 26-100; females  $\geq$ 26, 5=males  $\geq$ 100)

Childhood conduct problems (0=0, 1=1, 2=2 for males,  $\geq$ 2 for females, 3= $\geq$ 3 problem behaviors for males)

These variables were all available as ordinal as part of the HCP data release (none were made ordinal as part of the current analyses).

For further information see, <http://www.humanconnectome.org/documentation/>

<https://wiki.humanconnectome.org/display/PublicData/HCP+Data+Dictionary+Public+500+Subject+Release>

### **eAppendix 4.** Picture Vocabulary

Age-Adjusted Scale Scores from the NIH Toolbox Picture Vocabulary Test were included as a covariate in all analyses. The test was administered in a computerized adaptive format. Participants were presented with an audio recording of a word and four images on the computer screen and were asked to select the picture that most closely matched the meaning of the word. Scores are considered to be a measure of receptive vocabulary and a strong proxy of crystallized intelligence abilities. An age-adjusted score of 100 is considered average for one's age based on the NIH Toolbox normative data. Scores around 115 indicate above-average ability while individuals scoring around 130 are in the top ~2% nationally for their age. A score of 85 indicates below-average ability, while a score of 70 or below suggests significant impairment.

## **eAppendix 5. Additional Covariates**

- (a) Tobacco, alcohol, and other illicit drug use are highly comorbid with cannabis use<sup>1</sup>, thus these were included as additional covariates to control for potential confounds between substance use and brain volumes: The SSAGA was used to assess alcohol use (drinks per day during the 12-month heaviest period of use), cigarette use (heaviness of smoking index<sup>2</sup>, with those who had smoked <100 cigarettes lifetime coded as 0), and non-cannabis illicit drug use (times used across the lifetime).
- (b) To account for increased cannabis use in individuals with certain psychopathology<sup>3,4</sup>, which have been occasionally linked to structural variation<sup>5,6</sup>: Lifetime histories of DSM-IV major depressive disorder diagnosis and childhood conduct problems were also assessed by the SSAGA (see eMethods S3 for variable codings).
- (c) Personality measures have been implicated as correlates of cannabis use<sup>7</sup> and structural variation<sup>8</sup>: Personality measures included neuroticism, extraversion, openness, agreeableness and conscientiousness scores (from the revised 60-item NEO five factor inventory [NEO-FFI]<sup>9</sup> completed as part of the Penn Computerized Cognitive Battery<sup>10,11</sup>).
- (d) Impulsivity underlies cannabis use<sup>12</sup> and may be an index of predisposition to onset of use and may be related to volumetric alterations: A relatively coarse measure of impulsivity was computed from the ADHD subscale of the Achenbach Adult Self-Report (ASR) for Ages 18-59<sup>13</sup>. Specifically, we summed responses to the items: “I am impulsive or act without thinking”, “I am too impatient”, and “I rush into things without considering the risks”. Higher sum scores indicate a higher liability to impulsive behaviors. In addition, scores on a delay discounting task were used as an additional measure of impulsivity/self-regulation. Participants made six economic decisions between a larger, delayed reward (\$200) and a smaller, immediate reward to determine an ‘indifference point’ where a participant was equally likely to choose the immediate or delayed amount (for details, see <sup>14-16</sup>). We calculated area under the curve (AUC), a validated and reliable index of delay discounting<sup>17</sup>; smaller AUC indicates steeper discounting i.e. more impulsivity/less self-regulation.

**eTable 1. Sibling Pairs by Cannabis Exposure, Zygosity, and Sex**

| <b>Concordant Never Pairs</b>    | <b>Sibling Pairs</b> | <b>DZ Pairs</b> | <b>MZ Pairs</b> | <b>Total</b> | <b>Mean Age Difference<br/>for Sibling Pairs (years)</b> |
|----------------------------------|----------------------|-----------------|-----------------|--------------|----------------------------------------------------------|
| <b>Both Female</b>               | 24                   | 9               | 21              | 54           | 3.54                                                     |
| <b>Both Male</b>                 | 10                   | 4               | 3               | 17           | 4.40                                                     |
| <b>Opposite Sex</b>              | 43                   | 0               | 0               | 43           | 3.60                                                     |
| <b>Total</b>                     | 77                   | 13              | 24              | 114          | 3.68                                                     |
| <b>Concordant Ever Pairs</b>     | <b>Sibling Pairs</b> | <b>DZ Pairs</b> | <b>MZ Pairs</b> | <b>Total</b> |                                                          |
| <b>Both Female</b>               | 19                   | 9               | 11              | 39           | 4.74                                                     |
| <b>Both Male</b>                 | 28                   | 8               | 6               | 42           | 3.25                                                     |
| <b>Opposite Sex</b>              | 42                   | 0               | 0               | 42           | 3.62                                                     |
| <b>Total</b>                     | 89                   | 17              | 17              | 123          | 3.74                                                     |
| <b>Discordant Pairs</b>          | <b>Sibling Pairs</b> | <b>DZ Pairs</b> | <b>MZ Pairs</b> | <b>Total</b> |                                                          |
| <b>Both Female</b>               | 49                   | 13              | 5               | 67           | 3.45                                                     |
| <b>Both Male</b>                 | 16                   | 2               | 4               | 22           | 3.81                                                     |
| <b>Female User-Male Non-User</b> | 14                   | 0               | 0               | 14           | 4.64                                                     |
| <b>Male User-Female Non-User</b> | 46                   | 0               | 0               | 46           | 4.02                                                     |
| <b>Total</b>                     | 125                  | 15              | 9               | 149          | 3.84                                                     |

*A breakdown of sibling pairs (total N=386) is presented by concordance for cannabis use, pair zygosity, and sex. Pairs consisted of monozygotic twins (MZ, total N= 50 pairs), dizygotic twins (DZ, total N=45), or non-twin siblings (total N=291). Pairs were either same-sex (both female or both male) or opposite sex. All twin pairs were same-sex. The ordering of opposite sex pairs was randomized across concordant pairs, but was fixed for discordant pairs based on use. The count of pairs discordant for use and sex is presented split by female user-male non-user vs. male user-female non-user pairs. The final column presents mean age differences between individuals in non-twin sibling pairs, split by sex concordance, as well as overall mean values for each cannabis use discordance group.*

**eTable 2.** Summary of Regression Results Controlling for Additional Covariates

| Volume (mm <sup>3</sup> )  | Cannabis Exposure - Ever vs. Never Used (N=483) |               |              | Lifetime Amount of Use Among Exposed Individuals (N=262) |               |              | Age of Onset Among Exposed Individuals (N=262) |        |       |
|----------------------------|-------------------------------------------------|---------------|--------------|----------------------------------------------------------|---------------|--------------|------------------------------------------------|--------|-------|
|                            | b                                               | t             | p            | b                                                        | t             | p            | b                                              | t      | p     |
| Whole Brain                | -1807.514                                       | -0.216        | 0.829        | <b>-9438.681</b>                                         | <b>-2.236</b> | <b>0.026</b> | -1646.645                                      | -0.289 | 0.773 |
| Left Amygdala              | <b>-34.056</b>                                  | <b>-2.369</b> | <b>0.018</b> | -0.512                                                   | -0.068        | 0.946        | -0.046                                         | -0.005 | 0.996 |
| Right Amygdala             | -22.143                                         | -1.463        | 0.144        | -8.728                                                   | -1.148        | 0.252        | 1.716                                          | 0.170  | 0.865 |
| Left Hippocampus           | -38.097                                         | -1.028        | 0.304        | <b>-46.840</b>                                           | <b>-2.293</b> | <b>0.023</b> | 24.257                                         | 0.891  | 0.374 |
| Right Hippocampus          | 9.156                                           | 0.277         | 0.782        | -22.543                                                  | -1.290        | 0.198        | 28.763                                         | 1.246  | 0.214 |
| Left Ventral Striatum      | -5.459                                          | -0.683        | 0.495        | -1.006                                                   | -0.233        | 0.816        | 1.986                                          | 0.349  | 0.728 |
| Right Ventral Striatum     | <b>-20.355</b>                                  | <b>-2.428</b> | <b>0.016</b> | -3.910                                                   | -0.878        | 0.381        | 0.908                                          | 0.154  | 0.878 |
| Left Orbitofrontal Cortex  | -20.214                                         | -0.239        | 0.811        | 9.775                                                    | 0.218         | 0.828        | -50.560                                        | -0.855 | 0.393 |
| Right Orbitofrontal Cortex | 22.907                                          | 0.295         | 0.768        | 1.026                                                    | 0.025         | 0.980        | -15.913                                        | -0.289 | 0.773 |

*Unstandardized (b) regression coefficients and their associated t- and p-values for the effects of cannabis exposure, age of onset, and lifetime quantity of use from separate linear regression models predicting whole brain or regional volume. Regressions controlled for sex, age, ethnicity (White vs. not; African American vs. not), zygosity (Monozygotic vs. not; Dizygotic vs. not), alcohol use, cigarette use, non-cannabis illicit drug use, self-reported impulsivity, NEO-FFI scores, delay discounting, major depressive disorder history, childhood conduct problems, and whole brain volume (when predicting regional volumes). Negative regression coefficients indicate smaller volumes for exposed vs. unexposed individuals, with later age of onset, or greater lifetime quantity of use. Effects significant at  $p < 0.05$  are in bold.*

**eTable 3.** Helmert Contrast Coding

|                                                  | <b>Contrast 1<br/>Causal<br/>Hypothesis</b> | <b>Contrast 2<br/>Graded<br/>Liability<br/>Hypothesis</b> | <b>Contrast 3<br/>Predispositional<br/>Hypothesis</b> |
|--------------------------------------------------|---------------------------------------------|-----------------------------------------------------------|-------------------------------------------------------|
| <b>Unexposed Individual from Discordant Pair</b> | -1                                          | -1                                                        | -1                                                    |
| <b>Exposed Individual from Discordant Pair</b>   | 1                                           | -1                                                        | -1                                                    |
| <b>Concordant Exposed Pairs</b>                  | 0                                           | 2                                                         | -1                                                    |
| <b>Concordant Unexposed Pairs</b>                | 0                                           | 0                                                         | 3                                                     |

*The Helmert contrast coding scheme for the linear mixed model analyses is presented here. Contrast 1 compares exposed and unexposed siblings from discordant pairs. Contrast 2 compares individuals from concordant exposed pairs to individuals from discordant pairs. Contrast 3 compares individuals from concordant unexposed pairs to all other groups.*

**eTable 4. Relationships Between Covariates and Cannabis Use Variables**

| Variable                        | Test        | Cannabis Age of Onset | Cannabis Times Used |
|---------------------------------|-------------|-----------------------|---------------------|
| Sex (F>M)                       | t-test      | 2.36*                 | -5.39***            |
| Age (years)                     | Correlation | 0.05                  | -.122*              |
| White or Not                    | t-test      | 0.05                  | -2.19*              |
| African American or Not         | t-test      | 1.27                  | 2.17*               |
| Monozygotic or Not              | t-test      | -0.83                 | -0.30               |
| Dizygotic or Not                | t-test      | 0.55                  | -0.58               |
| Total Household Income          | Correlation | 0.11                  | -0.23***            |
| Age-Adjusted Picture Vocabulary | Correlation | 0.08                  | -0.05               |
| NEO Contentiousness             | Correlation | 0.04                  | -0.04               |
| NEO Extraversion                | Correlation | -0.01                 | -0.03               |
| NEO Neuroticism                 | Correlation | 0.02                  | -0.04               |
| NEO Openness                    | Correlation | -0.07                 | 0.28**              |
| NEO Agreeableness               | Correlation | 0.16**                | -.017**             |
| Delay Discounting               | Correlation | -0.04                 | 0.09                |
| Impulsivity                     | Correlation | -0.11                 | 0.09                |
| Alcohol Use                     | Correlation | -0.22**               | 0.30**              |
| Cigarette Use                   | Correlation | -0.35**               | 0.36**              |
| Illicit Drug Use                | Correlation | -.034**               | 0.53**              |
| Depression History              | t-test      | -1.20                 | 2.03*               |
| Childhood Conduct Problems      | Correlation | -0.20**               | 0.24**              |

Ordinal variables for age of onset of cannabis use and lifetime times using cannabis were related to all covariates of interest by either t-test (for binary covariates) or correlation. Thus, values represent t-statistics for t-test results and Pearson's r for correlations. Note that earlier age of onset relates to more lifetime use ( $r(260) = -0.42, p < 0.001$ ), so observed relationships with covariates tend to be in opposite directions for these two variables, i.e. females begin using cannabis at a later age and use less over their lifetime.

\*  $p < 0.05$ , \*\*  $p < 0.01$ , \*\*\*  $p < 0.001$

**eTable 5.** Descriptive Statistics and Intercorrelations Among Brain Volumes

|                                         | Mean       | SD        | Inter-Correlations |            |         |          |         |          |          |           |
|-----------------------------------------|------------|-----------|--------------------|------------|---------|----------|---------|----------|----------|-----------|
|                                         |            |           | Left Amyg          | Right Amyg | Left HC | Right HC | Left VS | Right VS | Left OFC | Right OFC |
| <b>Whole Brain Volume</b>               | 1116835.18 | 112422.14 | 0.71               | 0.72       | 0.67    | 0.71     | 0.55    | 0.57     | 0.83     | 0.84      |
| <b>Left Amygdala (Amyg)</b>             | 1526.22    | 192.22    |                    | 0.81       | 0.68    | 0.67     | 0.42    | 0.44     | 0.57     | 0.60      |
| <b>Right Amygdala (Amyg)</b>            | 1610.18    | 204.61    |                    |            | 0.65    | 0.66     | 0.42    | 0.41     | 0.57     | 0.60      |
| <b>Left Hippocampus (HC)</b>            | 4344.16    | 465.88    |                    |            |         | 0.78     | 0.39    | 0.34     | 0.46     | 0.53      |
| <b>Right Hippocampus (HC)</b>           | 4406.23    | 439.93    |                    |            |         |          | 0.44    | 0.44     | 0.48     | 0.57      |
| <b>Left Ventral Striatum (VS)</b>       | 557.04     | 92.45     |                    |            |         |          |         | 0.70     | 0.53     | 0.55      |
| <b>Right Ventral Striatum (VS)</b>      | 597.09     | 98.02     |                    |            |         |          |         |          | 0.57     | 0.59      |
| <b>Left Orbitofrontal Cortex (OFC)</b>  | 12369.45   | 1417.05   |                    |            |         |          |         |          |          | 0.82      |
| <b>Right Orbitofrontal Cortex (OFC)</b> | 12233.55   | 1339.60   |                    |            |         |          |         |          |          |           |

Mean and standard deviation (SD) values are presented for each brain volume of interest (N=483). Pearson's correlation between all volumes of interest were also presented. All correlations were significant  $p < 0.001$ .



**eTable 6.** Interrelationships Among Covariates

|                           | Age  | White | African Am. | MZ Twin  | DZ Twin | NEO-C   | NEO-E   | NEO-N    | NEO-O  | NEO-A   | Delay Disc. | Impuls.  | Alcohol  | Cig.    | Illicit  | MDD      | Conduct |        |
|---------------------------|------|-------|-------------|----------|---------|---------|---------|----------|--------|---------|-------------|----------|----------|---------|----------|----------|---------|--------|
| <b>Sex (F&gt;M)</b>       | 0.63 | 0.06  | 0.06        | 13.81*** | 1.54    | 2.52*   | 0.37    | 3.02**   | -2.21* | 3.32**  | -1.01       | -2.54*   | -2.64**  | -2.58*  | -4.20*** | 0.00     | -0.29** |        |
| <b>Age (years)</b>        |      | 2.03* | -1.70       | 3.33**   | 2.97**  | 0.07    | 0.00    | -0.03    | -0.12* | 0.11*   | 0.03        | -0.15**  | 0.02     | 0.11*   | 0.02     | -0.64    | 0.03    |        |
| <b>White or Not</b>       |      |       | -           | 11.55**  | 0.72    | -1.12   | 1.60    | 0.29     | -1.11  | 3.93*** | 7.09***     | -1.12    | 3.43**   | -0.49   | 0.77     | 2.81     | -0.12** |        |
| <b>African Am. or Not</b> |      |       |             | 7.02*    | 0.33    | 2.02*   | -1.05   | -1.09    | 0.57   | -2.89** | -7.31***    | 0.44     | -3.83*** | 0.92    | -1.92    | 1.43     | 0.09    |        |
| <b>Monozygotic or Not</b> |      |       |             |          | -       | 4.65*** | 3.86*** | -2.37*   | -2.38* | 4.78*** | 0.42        | -4.18*** | 0.63     | -0.07   | -0.85    | 2.41     | -0.10*  |        |
| <b>Dizygotic or Not</b>   |      |       |             |          |         | -1.42   | -1.05   | 0.14     | -1.55  | 0.81    | -1.23       | -2.22*   | -0.60    | 1.24    | 0.34     | 0.63     | -0.07   |        |
| <b>NEO</b>                |      |       |             |          |         |         |         |          |        |         |             |          |          |         |          |          |         |        |
| <b>Contentiousness</b>    |      |       |             |          |         |         | 0.35**  | -0.42**  | -0.06  | 0.24**  | -0.04       | -0.26**  | 0.03     | -0.02   | -0.11*   | -2.26*   | -0.03   |        |
| <b>NEO Extraversion</b>   |      |       |             |          |         |         |         | -0.379** | 0.06   | 0.34**  | -0.01       | -0.02    | 0.14**   | -0.01   | 0.01     | -4.49*** | -0.03   |        |
| <b>NEO Neuroticism</b>    |      |       |             |          |         |         |         |          | 0.01   | -0.29** | -0.03       | 0.24**   | -0.06    | -0.01   | -0.01    | 5.20***  | 0.07    |        |
| <b>NEO Openness</b>       |      |       |             |          |         |         |         |          |        | 0.13**  | 0.08        | 0.00     | 0.05     | 0.03    | 0.19**   | 2.70**   | 0.11*   |        |
| <b>NEO Agreeableness</b>  |      |       |             |          |         |         |         |          |        |         | .090*       | -0.031** | -0.11*   | -0.17** | -0.10*   | -2.20*   | -0.27** |        |
| <b>Delay Discounting</b>  |      |       |             |          |         |         |         |          |        |         |             | -0.08    | -0.07    | -0.13** | 0.03     | 1.79     | 0.00    |        |
| <b>Impulsivity</b>        |      |       |             |          |         |         |         |          |        |         |             |          | 0.06     | 0.01*   | 0.02     | 1.94     | 0.12**  |        |
| <b>Alcohol Use</b>        |      |       |             |          |         |         |         |          |        |         |             |          |          | 0.28**  | 0.31**   | -0.31    | 0.14**  |        |
| <b>Cigarette Use</b>      |      |       |             |          |         |         |         |          |        |         |             |          |          |         | 0.36**   | 0.61     | 0.11*   |        |
| <b>Illicit Drug Use</b>   |      |       |             |          |         |         |         |          |        |         |             |          |          |         |          | 0.89     | 0.27**  |        |
| <b>Depression History</b> |      |       |             |          |         |         |         |          |        |         |             |          |          |         |          |          |         | 0.21** |

Values represent *t*-statistics when comparing a binary and a continuous variable by independent-samples *t*-test,  $\chi^2$  statistics when comparing two binary variables, or Pearson's *r* coefficients relating two continuous variables. Sex, ethnicity, zygosity, and depression history are binary variables.

\*  $p < 0.05$ , \*\*  $p < 0.01$ , \*\*\*  $p < 0.001$

**eTable 7.** Full Cannabis Exposure Regression Results

|                         | WBV                   | L. Amyg.          | R. Amyg.         | L. Hipp.           | R. Hipp.           | L. Accumb.      | R. Accumb.       | L. OFC           | R. OFC            |
|-------------------------|-----------------------|-------------------|------------------|--------------------|--------------------|-----------------|------------------|------------------|-------------------|
| Intercept               | <b>1114080.197***</b> | <b>523.688***</b> | <b>405.275**</b> | <b>1426.197***</b> | <b>1540.894***</b> | 50.159          | <b>163.683*</b>  | <b>1555.591*</b> | <b>1918.633**</b> |
| Cannabis Use            | -6684.224             | <b>-34.676**</b>  | -20.644          | -29.514            | 14.900             | -0.585          | <b>-20.866**</b> | -88.716          | -21.509           |
| Whole Brain Volume      | -                     | <b>0.001***</b>   | <b>0.001***</b>  | <b>0.002***</b>    | <b>0.002***</b>    | <b>0.001***</b> | <b>0.001***</b>  | <b>0.01***</b>   | <b>0.01***</b>    |
| Sex (F>M)               | <b>-145402.729***</b> | <b>-71.587***</b> | <b>-51.932**</b> | -45.333            | -62.71             | 10.119          | -3.252           | -46.98           | 21.655            |
| White or Not            | <b>39478.07*</b>      | -4.96             | 13.682           | 138.584            | <b>252.801***</b>  | -27.226         | -11.341          | -55.404          | -13.105           |
| African American or Not | -2721.389             | -11.602           | -1.853           | 65.114             | <b>220.602**</b>   | -1.623          | 8.176            | -108.448         | -86.000           |
| Age (years)             | -1684.557             | -1.357            | -0.442           | 1.997              | 0.798              | -2.031.         | <b>-3.129**</b>  | -16.84           | <b>-34.557**</b>  |
| Monozygotic or Not      | -9596.319             | -3.394            | -11.872          | <b>-113.456**</b>  | -47.686            | -9.438          | -10.208          | -174.268.        | -144.654          |
| Dizygotic or Not        | 3431.441              | 17.936            | 16.554           | -61.935            | -56.675            | <b>-18.192*</b> | -3.469           | -69.531          | -69.696           |
| Income                  | <b>6715.404***</b>    | 3.38              | 2.41             | -2.55              | -2.55              | 13.368          | -1.80            | -1.75            | 29.65             |
| Picture Vocabulary      | <b>937.851***</b>     | -0.44             | -0.41            | 1.62               | 1.62               | 1.22            | 0.38             | 0.00             | 0.08              |

*Unstandardized regression coefficients for cannabis exposure (ever vs. never used cannabis) and all covariates predicting whole brain volume and left and right amygdala, hippocampus, ventral striatum, and orbitofrontal cortex volumes are presented. Significant effects are in bold.*

*\* p<0.05, \*\* p<0.01, \*\*\* p<0.001*

**eTable 8.** Full Times Used Regression Results

|                         | <b>WBV</b>            | <b>L. Amyg.</b>  | <b>R. Amyg.</b>  | <b>L. Hipp.</b>   | <b>R. Hipp.</b>    | <b>L. Accumb.</b> | <b>R. Accumb.</b> | <b>L. OFC</b>   | <b>R. OFC</b>      |
|-------------------------|-----------------------|------------------|------------------|-------------------|--------------------|-------------------|-------------------|-----------------|--------------------|
| Intercept               | <b>1148775.959***</b> | <b>487.155**</b> | <b>487.577**</b> | <b>2035.91***</b> | <b>2147.548***</b> | 126.569           | <b>220.057*</b>   | 1724.505        | <b>3044.788***</b> |
| Cannabis Use            | -6568.307             | -4.723           | -10.497          | -31.834           | -15.578            | 0.256             | -2.834            | -26.001         | -39.727            |
| Whole Brain Volume      | -                     | <b>0.001***</b>  | <b>0.001***</b>  | <b>0.002***</b>   | <b>0.002***</b>    | <b>0.001***</b>   | <b>0.001***</b>   | <b>0.010***</b> | <b>0.009***</b>    |
| Sex (F>M)               | <b>-162659.104***</b> | <b>-71.631**</b> | <b>-67.823**</b> | -78.05            | -94.895            | 3.584             | -18.274           | -88.973         | -211.221           |
| White or Not            | 32149.864             | -13.079          | -5.416           | 103.305           | 154.803.           | -21.465           | -3.088            | -40.713         | 67.811             |
| African American or Not | 242.661               | -16.501          | -16.268          | 11.313            | 52.563             | 1.856             | 12.643            | -165.457        | 29.456             |
| Age (years)             | -2452.965             | 0.308            | -0.261           | -9.220            | -6.608             | -2.129            | -2.825            | -27.889         | <b>-32.023*</b>    |
| Monozygotic or Not      | -4965.48              | -34.71           | -29.256          | -92.885           | -57.716            | -9.393            | -12.469           | -192.975        | <b>-276.029*</b>   |
| Dizygotic or Not        | 1123.352              | -8.526           | -9.297           | -83.447           | -67.827            | -11.714           | -2.038            | -128.261        | -208.752.          |
| Income                  | <b>6034.039*</b>      | 7.27             | 1.72             | 14.93             | 14.93              | <b>32.772**</b>   | -2.03             | -1.55           | 29.66              |
| Picture Vocabulary      | <b>1054.727**</b>     | -1.053.          | -0.56            | -0.92             | -0.92              | -0.30             | -0.09             | -0.12           | 3.64               |

*Unstandardized regression coefficients for times using cannabis among exposed individuals (N=262) and all covariates predicting whole brain volume and left and right amygdala, hippocampus, ventral striatum, and orbitofrontal cortex volumes are presented. Significant effects are in bold.*

*\* p<0.05, \*\* p<0.01, \*\*\* p<0.001*

**eTable 9.** Full Age at Onset Regression Results

|                         | <b>WBV</b>            | <b>L. Amyg.</b>  | <b>R. Amyg.</b> | <b>L. Hipp.</b>    | <b>R. Hipp.</b>    | <b>L. Accumb.</b> | <b>R. Accumb.</b> | <b>L. OFC</b>   | <b>R. OFC</b>     |
|-------------------------|-----------------------|------------------|-----------------|--------------------|--------------------|-------------------|-------------------|-----------------|-------------------|
| Intercept               | <b>1119521.438***</b> | <b>453.069**</b> | <b>411.452*</b> | <b>1799.812***</b> | <b>2012.669***</b> | 126.42            | <b>198.645*</b>   | 1566.643        | <b>2753.595**</b> |
| Cannabis Use            | 721.671               | 2.347            | 5.578           | 21.933             | 29.314             | 1.792             | 2.33              | -15.677         | 24.066            |
| Whole Brain Volume      | -                     | <b>0.001***</b>  | <b>0.001***</b> | <b>0.003***</b>    | <b>0.002***</b>    | <b>0.001***</b>   | <b>0.001***</b>   | <b>0.010***</b> | <b>0.009***</b>   |
| Sex (F>M)               | <b>-155918.707***</b> | <b>-65.874**</b> | <b>-55.155*</b> | -41.383            | -83.441            | 2.601             | -15.141           | -47.293         | -164.308          |
| White or Not            | 32644.176             | -13.826          | -7.229          | 95.681             | 143.199            | -22.237           | -3.926            | -32.708         | 59.696            |
| African American or Not | -1758.147             | -19.233          | -22.599         | -11.475            | 28.134             | 0.632             | 10.345            | -160.066        | 3.381             |
| Age (years)             | -2343.358             | 0.391            | -0.08           | -8.724             | -6.559             | -2.153            | -2.785            | -27.134.        | <b>-31.369*</b>   |
| Monozygotic or Not      | -6841.627             | -35.534          | -30.996         | -96.912            | -55.055            | -8.869            | -12.734           | -204.637        | <b>-281.879*</b>  |
| Dizygotic or Not        | 580.846               | -8.853           | -10.01          | -85.421            | -68.094            | -11.624           | -2.2              | -131.135        | -211.34           |
| Income                  | <b>6936.764*</b>      | 7.747            | 2.76            | 17.79              | 17.79              | <b>33.118**</b>   | -2.16             | -1.32           | 33.90             |
| Picture Vocabulary      | <b>1047.632**</b>     | -1.083           | -0.63           | -1.16              | -1.16              | -0.56             | -0.11             | -0.14           | 3.69              |

*Unstandardized regression coefficients for cannabis age of onset among exposed individuals (N=262) and all covariates predicting whole brain volume and left and right amygdala, hippocampus, ventral striatum, and orbitofrontal cortex volumes are presented. Significant effects are in bold.*

*\* p<0.05, \*\* p<0.01, \*\*\* p<0.001*

**eTable 10.** Volume Relationships With Cannabis Use by Light vs Heavier Use

|                                                                  | Left Amygdala           |              |                  | Right Ventral Striatum  |              |                  |
|------------------------------------------------------------------|-------------------------|--------------|------------------|-------------------------|--------------|------------------|
|                                                                  | Robust Coefficient      | t            | p                | Robust Coefficient      | t            | p                |
| Intercept                                                        | <b>533.252</b>          | <b>3.71</b>  | <b>&lt;0.001</b> | <b>170.499</b>          | <b>2.38</b>  | <b>0.018</b>     |
| Cannabis Use <100 times                                          | <b>-32.479</b>          | <b>-2.37</b> | <b>0.019</b>     | <b>-19.549</b>          | <b>-2.30</b> | <b>0.023</b>     |
| Cannabis Use ≥100 times                                          | <b>-43.323</b>          | <b>-2.25</b> | <b>0.026</b>     | <b>-26.663</b>          | <b>-2.25</b> | <b>0.025</b>     |
| Whole Brain Volume                                               | <b>0.001</b>            | <b>9.25</b>  | <b>&lt;0.001</b> | <b>.0004</b>            | <b>10.94</b> | <b>&lt;0.001</b> |
| Sex (F>M)                                                        | <b>-74.784</b>          | <b>-3.47</b> | <b>0.001</b>     | -5.629                  | -0.52        | 0.603            |
| White or Not                                                     | -5.592                  | -0.21        | 0.832            | -11.907                 | -0.69        | 0.489            |
| African American or Not                                          | -12.950                 | -0.45        | 0.657            | 6.916                   | 0.36         | 0.721            |
| Age (years)                                                      | -1.472                  | -0.74        | 0.460            | <b>-3.218</b>           | <b>-2.42</b> | <b>0.017</b>     |
| Monozygotic or Not                                               | -2.062                  | -0.12        | 0.908            | -9.192                  | -0.85        | 0.395            |
| Dizygotic or Not                                                 | 18.900                  | 1.25         | 0.214            | -2.675                  | -0.26        | 0.792            |
| Income                                                           | 3.350                   | 1.02         | 0.307            | -1.714                  | -0.77        | 0.444            |
| Picture Vocabulary                                               | -0.410                  | -0.75        | 0.454            | 0.023                   | 0.07         | 0.943            |
| Test comparing coefficients for cannabis use <100 vs. ≥100 times | F(1, 204)=0.32, p=0.574 |              |                  | F(1, 204)=0.35, p=0.553 |              |                  |

Analyses conducted in STATA with dummy coded variables representing lifetime cannabis use of <100 and ≥100 times, with never use as the reference group. Individual estimates indicate that both dummy codes (<100 and ≥100 times) are significantly associated with brain volumes. Post-hoc comparisons between the estimates for each dummy tested whether the difference between the coefficients for <100 and ≥100 times could be equated to zero (i.e. not statistically different from each other). A non-significant result indicates that there are no significant differences in the magnitude of association between brain volumes and using cannabis <100 and ≥100 times. A robust sandwich variance estimator was used to adjust standard errors for familial clustering.

**eTable 11.** Linear Mixed Model Results for Same-Sex Sibling Pairs

| Effect                       | WBV                 | L. Amyg         | R. Amyg         | L. HC           | R. HC            | L. VS           | R. VS           | L. OFC          | R. OFC            |
|------------------------------|---------------------|-----------------|-----------------|-----------------|------------------|-----------------|-----------------|-----------------|-------------------|
| Intercept                    | <b>1055403.1***</b> | <b>338.80**</b> | <b>140.70</b>   | <b>872.60**</b> | <b>895.00***</b> | 78.020          | <b>169.30*</b>  | 93.330          | <b>2333.00***</b> |
| Whole Brain Volume           | -                   | <b>0.001***</b> | <b>0.001***</b> | <b>0.003***</b> | <b>0.003***</b>  | <b>0.001***</b> | <b>0.001***</b> | <b>0.011***</b> | <b>0.01***</b>    |
| Sex (F>M)                    | -142727***          | -43.98#         | -5.431          | -0.151          | -3.560           | 16.720          | 5.454           | 173.000         | 44.490            |
| White or Not                 | 17771.10            | 37.350          | 14.390          | 117.700         | 125.900          | <b>-47.07*</b>  | -6.592          | -126.200        | -27.990           |
| African American or Not      | -11327.00           | 39.860          | -13.710         | 73.310          | 139.700          | -21.000         | 11.850          | -32.470         | -83.420           |
| Age (years)                  | 188.800             | -0.496          | -0.139          | 5.345           | 2.868            | -2.082#         | <b>-3.011*</b>  | -15.490         | <b>-48.78***</b>  |
| Monozygotic vs. Sibling Pair | -918.800            | -14.990         | -14.400         | <b>-87.49*</b>  | -7.614           | -5.892          | -14.580         | -22.470         | -28.920           |
| Dizygotic vs. Sibling Pair   | 2714.000            | 7.459           | 15.390          | -40.200         | -35.670          | -12.690         | -6.443          | 85.380          | -12.800           |
| Income                       | <b>4799.9**</b>     | 1.779           | -2.542          | -6.074          | 0.951            | -1.479          | <b>-4.572*</b>  | -15.140         | -13.730           |
| Picture Vocabulary           | <b>970.5***</b>     | 0.691           | 0.388           | <b>4.373***</b> | <b>4.914***</b>  | -0.225          | -0.399          | 1.090           | -0.808            |
| <b>Contrast 1</b>            | -6274.600           | -7.431          | -1.961          | 16.430          | 23.810           | -1.221          | -1.628          | 59.520          | -30.180           |
| <b>Contrast 2</b>            | -3523.900           | 4.312           | -0.902          | 1.098           | 4.899            | -1.785          | -2.151          | -12.600         | -10.380           |
| <b>Contrast 3</b>            | 1803.400            | <b>12.56**</b>  | 7.743#          | 6.028           | -9.214           | -2.088          | 2.731           | 8.593           | 4.190             |

Estimates of fixed effects from the linear mixed model analyses examining same-sex sibling pairs are presented. Effects significant at  $p < 0.05$  are in bold; significant effects of the Helmert contrasts (eTable 2) are shaded gray. # $p < 0.10$ , \* $p < 0.05$ , \*\* $p < 0.01$ , \*\*\* $p < 0.001$

**eTable 12.** Linear Mixed Model Results for All Sibling Pairs

| <b>Effect</b>                       | <b>WBV</b>          | <b>L. Amyg</b>   | <b>R. Amyg</b>  | <b>L. HC</b>    | <b>R. HC</b>      | <b>L. VS</b>    | <b>R. VS</b>    | <b>L. OFC</b>   | <b>R. OFC</b>     |
|-------------------------------------|---------------------|------------------|-----------------|-----------------|-------------------|-----------------|-----------------|-----------------|-------------------|
| Intercept                           | <b>1067574.5***</b> | <b>386.7***</b>  | 184.50#         | <b>803.10**</b> | <b>1049.00***</b> | 96.57#          | <b>159.00**</b> | <b>1135.00*</b> | <b>1607.00***</b> |
| Whole Brain Volume                  | -                   | <b>0.001***</b>  | <b>0.001***</b> | <b>0.003***</b> | <b>0.003***</b>   | <b>0.001***</b> | <b>0.001***</b> | <b>0.011***</b> | <b>0.01***</b>    |
| Sex (F>M)                           | <b>-144400.3***</b> | <b>-66.01***</b> | -23.940         | -33.350         | -22.730           | 5.597           | -0.770          | 33.540          | 24.190            |
| White or Not                        | 25077.000           | 32.560           | -12.320         | 98.530          | <b>233.9***</b>   | <b>-41.03*</b>  | -9.898          | -208.200        | 19.730            |
| African American or Not             | -8892.600           | 31.870           | -25.930         | 83.030          | <b>239**</b>      | -15.070         | 8.002           | -261.000        | -103.300          |
| Age (years)                         | -791.700            | 1.110            | 1.003           | 6.062           | 2.494             | <b>-1.928*</b>  | <b>-2.957**</b> | -17.97#         | <b>-29.68***</b>  |
| Monozygotic vs. Sibling Pair        | -2823.200           | -6.607           | -6.625          | -72.07#         | 1.103             | -1.335          | -14.45#         | -30.890         | -62.370           |
| Dizygotic vs. Sibling Pair          | 1026.700            | 11.490           | 23.890          | -34.360         | -45.630           | -10.670         | -6.308          | 78.370          | -34.870           |
| Income                              | <b>4836.3***</b>    | 2.815            | -1.324          | -2.121          | 8.665             | -2.441#         | <b>-3.082*</b>  | -12.320         | -22.43#           |
| Picture Vocabulary                  | <b>1237***</b>      | 0.454            | 0.534           | <b>3.789***</b> | <b>3.003**</b>    | -0.093          | -0.312          | -0.488          | 1.959             |
| Sex Concordant vs. Discordant Pair  | -9268.400           | -7.066           | -9.236          | 29.120          | 5.840             | -1.617          | 4.582           | -101.700        | -71.410           |
| <b>Contrast 1</b>                   | 8125.200            | <b>-25.88**</b>  | -13.440         | -18.530         | -25.090           | -5.044          | <b>-16.2**</b>  | 0.867           | -39.630           |
| <b>Contrast 2</b>                   | -2892.900           | 0.103            | -0.294          | -5.580          | 4.891             | -3.060          | -4.179#         | -26.590         | -10.590           |
| <b>Contrast 3</b>                   | 1665.000            | <b>9.511**</b>   | 5.800           | 7.149           | -3.367            | -0.767          | 3.414#          | -2.388          | 7.950             |
| <b>Contrast 1 x Sex Concordance</b> | <b>-14930.5*</b>    | 19.280           | 11.830          | 37.120          | 50.81#            | 3.517           | <b>14.91*</b>   | 53.590          | 17.340            |

Estimates of fixed effects from the linear mixed model analyses examining all sibling pairs are presented. Effects significant at  $p < 0.05$  are in bold; significant effects of the Helmert contrasts (eTable 2) are shaded gray. # $p < 0.10$ , \* $p < 0.05$ , \*\* $p < 0.01$ , \*\*\* $p < 0.001$

**eTable 13.** Control Analysis Results

|                                   | <b>Discordant Users vs. Unrelated Individuals</b> |                |
|-----------------------------------|---------------------------------------------------|----------------|
|                                   | <b>t</b>                                          | <b>p-value</b> |
| <b>Whole Brain Volume</b>         | -1.69                                             | 0.09           |
| <b>Left Amygdala</b>              | <b>-3.44</b>                                      | <b>0.001</b>   |
| <b>Right Amygdala</b>             | -1.69                                             | 0.09           |
| <b>Left Hippocampus</b>           | -0.99                                             | 0.33           |
| <b>Right Hippocampus</b>          | -0.41                                             | 0.68           |
| <b>Left Ventral Striatum</b>      | 0.34                                              | 0.74           |
| <b>Right Ventral Striatum</b>     | -1.24                                             | 0.22           |
| <b>Left Orbitofrontal Cortex</b>  | -1.72                                             | 0.09           |
| <b>Right Orbitofrontal Cortex</b> | -1.98                                             | 0.05           |

*We compared the cannabis-exposed individuals from same-sex discordant pairs (N=89) with unrelated but sex-matched unexposed individuals using a pair t-test. T-statistics and their associated p-value for the paired t-test are presented.*



**eFigure. Histogram of Age at Onset and Times Using Cannabis**

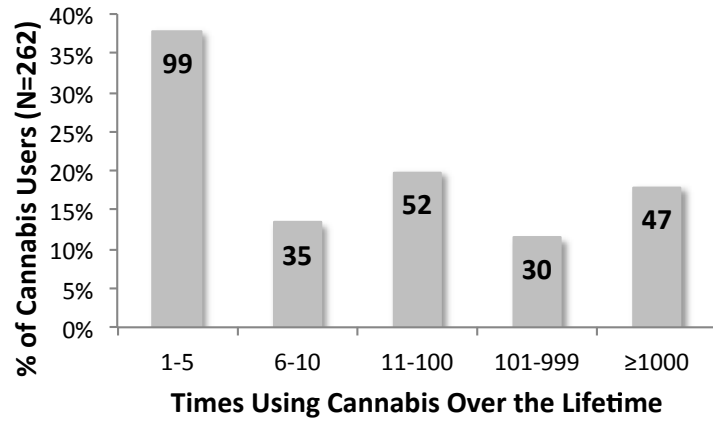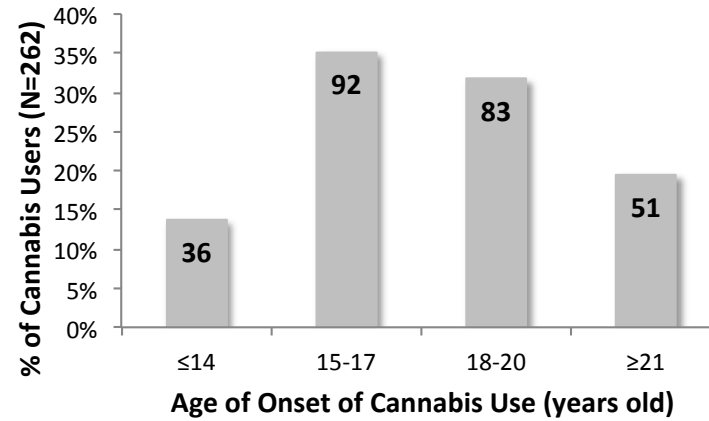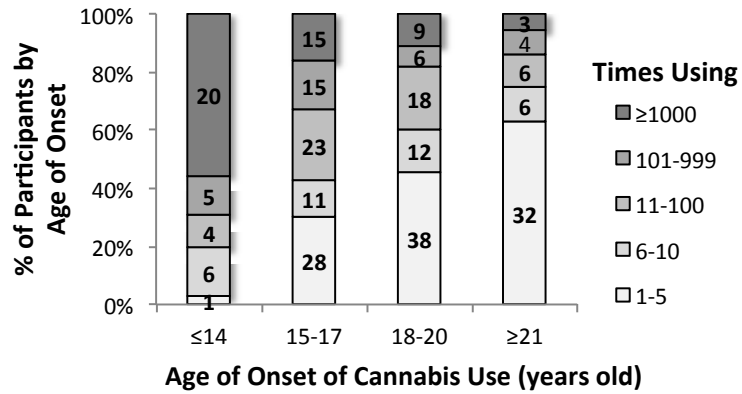

## eReferences

1. Kandel D, Yamaguchi K. From beer to crack: developmental patterns of drug involvement. *American Journal of Public Health*. 1993;83(6):851–855. doi:10.2105/AJPH.83.6.851.
2. Heatherton TF, Kozlowski LT, Frecker RC, Rickert W, Robinson J. Measuring the heaviness of smoking: using self-reported time to the first cigarette of the day and number of cigarettes smoked per day. *Br J Addict*. 1989;84(7):791–799.
3. Patton GC, Coffey C, Carlin JB, Degenhardt L, Lynskey M, Hall W. Cannabis use and mental health in young people: cohort study. *BMJ*. 2002;325(7374):1195–1198.
4. Elkins IJ, McGue M, Iacono WG. Prospective Effects of Attention-Deficit/Hyperactivity Disorder, Conduct Disorder, and Sex on Adolescent Substance Use and Abuse. 2007;64(10):1145–1152. doi:10.1001/archpsyc.64.10.1145.
5. Hajek T, Kopecek M, Kozeny J, Gunde E, Alda M, Höschl C. Amygdala volumes in mood disorders — Meta-analysis of magnetic resonance volumetry studies. *Journal of Affective Disorders*. 2009;115(3):395–410. doi:10.1016/j.jad.2008.10.007.
6. Valera EM, Faraone SV, Murray KE, Seidman LJ. Meta-Analysis of Structural Imaging Findings in Attention-Deficit/Hyperactivity Disorder. *Biological Psychiatry*. 2007;61(12):1361–1369. doi:10.1016/j.biopsych.2006.06.011.
7. Vink JM, Nawijn L, Boomsma DI, Willemsen G. Personality differences in monozygotic twins discordant for cannabis use. *Addiction*. 2007;102(12):1942–1946. doi:10.1111/j.1360-0443.2007.02008.x.
8. Lewis GJ, Panizzon MS, Eyer L, et al. Heritable influences on amygdala and orbitofrontal cortex contribute to genetic variation in core dimensions of personality. *NeuroImage*. 2014;103:309–315. doi:10.1016/j.neuroimage.2014.09.043.
9. McCrae RR, Costa PT Jr. A contemplated revision of the NEO Five-Factor Inventory. *Personality and Individual Differences*. 2004;36(3):587–596. doi:10.1016/S0191-8869(03)00118-1.
10. Gur R. Computerized Neurocognitive Scanning: I. Methodology and Validation in Healthy People. *Neuropsychopharmacology*. 2001;25(5):766–776. doi:10.1016/S0893-133X(01)00278-0.
11. Gur RC, Richard J, Hughett P, et al. A cognitive neuroscience-based computerized battery for efficient measurement of individual differences: Standardization and initial construct validation. *Journal of Neuroscience Methods*. 2010;187(2):254–262. doi:10.1016/j.jneumeth.2009.11.017.
12. Wrege J, Schmidt A, Walter A, et al. Effects of Cannabis on Impulsivity: A Systematic Review of Neuroimaging Findings. *Curr Pharm Des*. 2014;20(13):2126–2137. doi:10.2174/13816128113199990428.

13. Achenbach TM. *Achenbach System of Empirically Based Assessment (ASEBA)*. University of Vermont Research Center of Children Youth & Families; 2009.
14. Estle SJ, Green L, Myerson J, Holt DD. Differential effects of amount on temporal and probability discounting of gains and losses. *Memory & Cognition*. 2006;34(4):914–928.
15. Green L, Myerson J, Shah AK, Estle SJ, Holt DD. Do adjusting-amount and adjusting-delay procedures produce equivalent estimates of subjective value in pigeons? *J Exp Anal Behav*. 2007;87(3):337–347.
16. Barch DM, Burgess GC, Harms MP, et al. Function in the human connectome: Task-fMRI and individual differences in behavior. *NeuroImage*. 2013;80(C):169–189. doi:10.1016/j.neuroimage.2013.05.033.
17. Myerson J, Green L, Warusawitharana M. Area under the curve as a measure of discounting. *J Exp Anal Behav*. 2001;76(2):235–243. doi:10.1901/jeab.2001.76-235.
